# Supplementary material
Source: Research Square preprint supplement (doi:10.21203/rs.3.rs-9443065/v1)

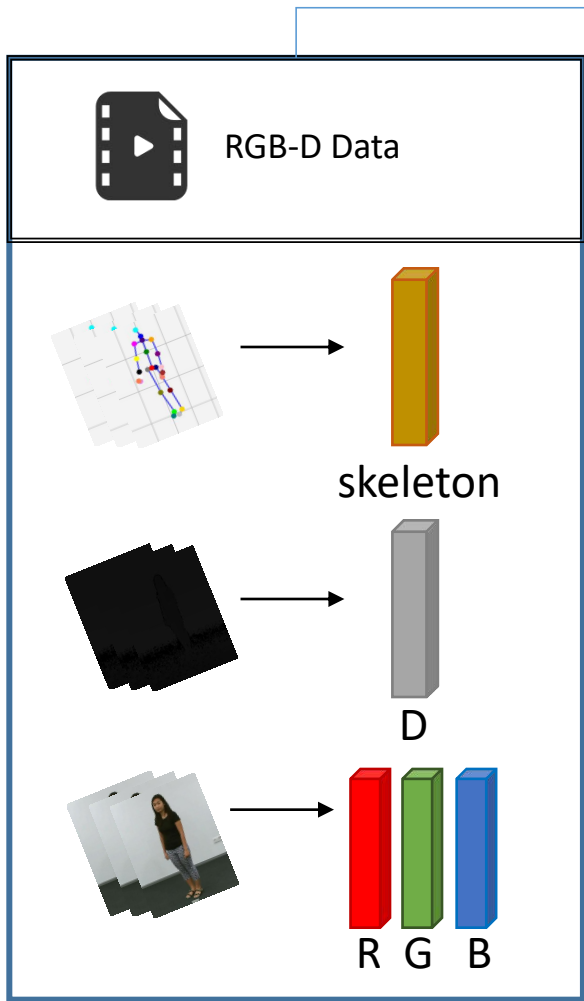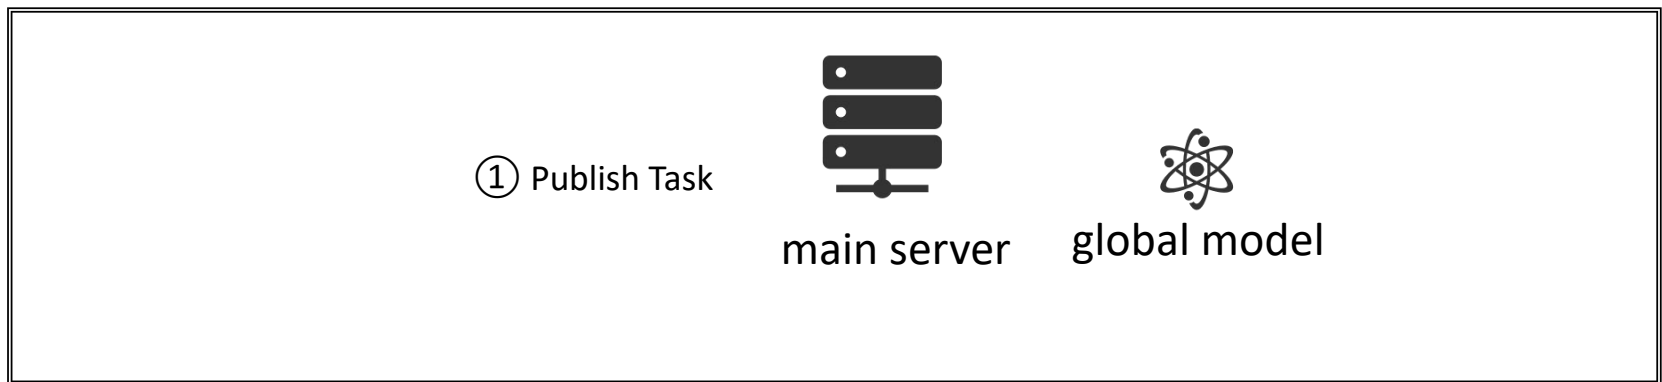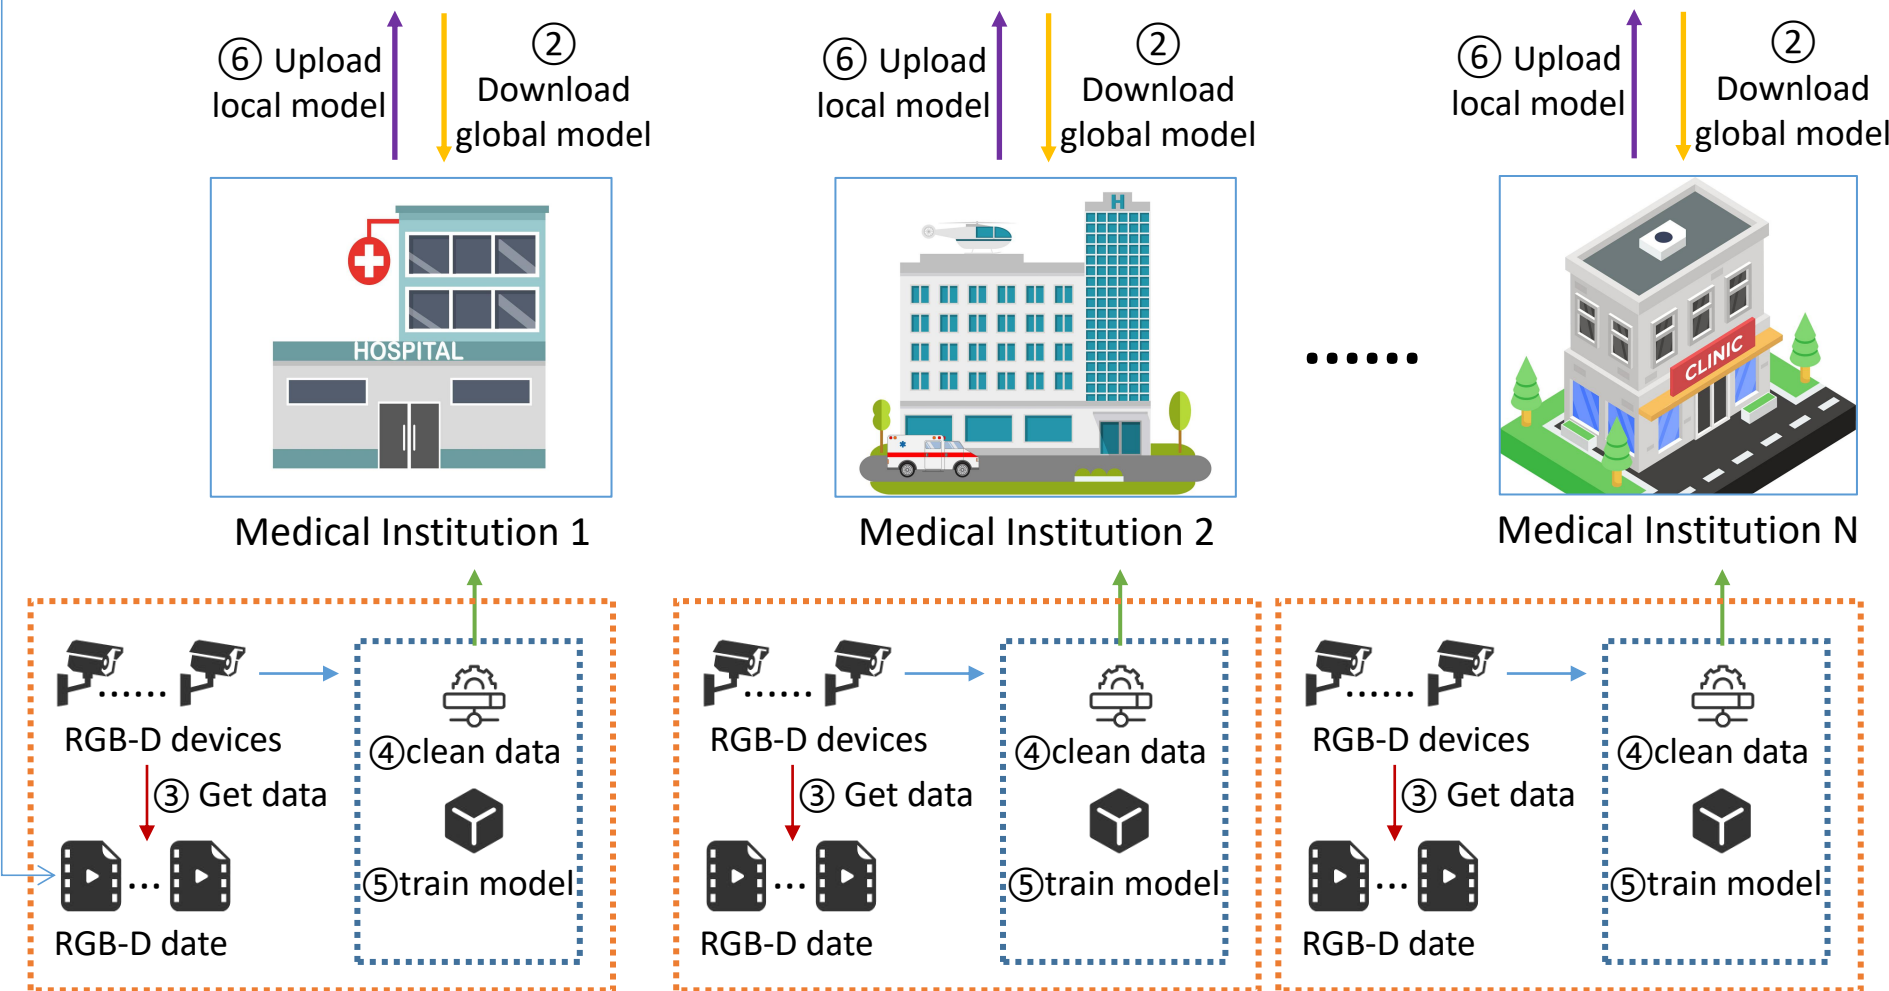

Supplement: Supplementary file 1 [file Figure 1.pdf › Figure and Table/Figure 1.pdf]

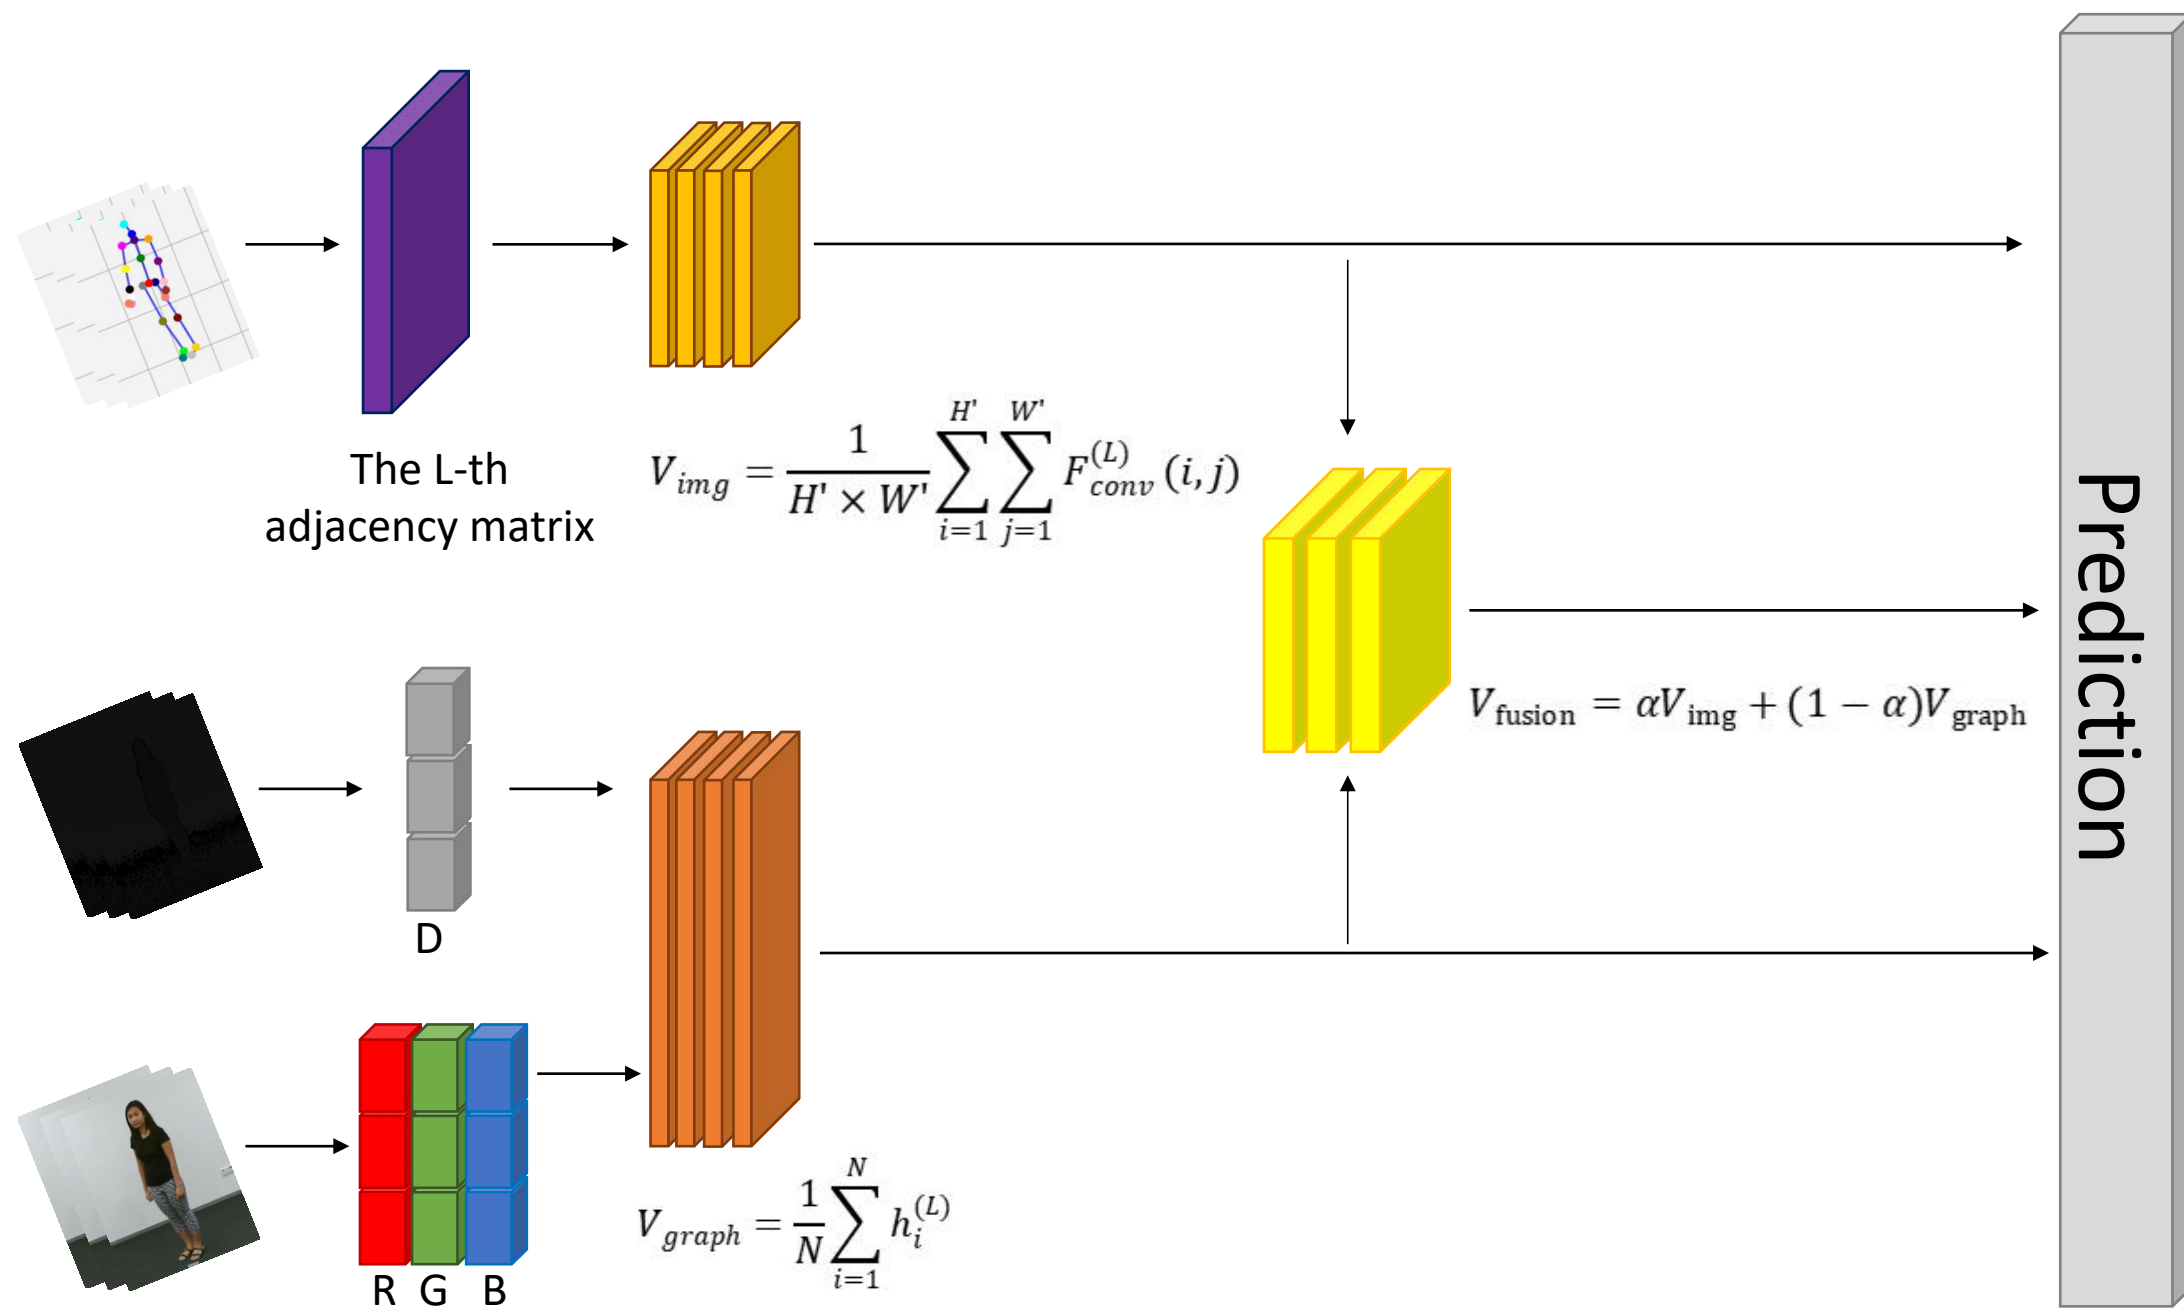

Supplement: Supplementary file 2 [file Figure 2.pdf › Figure and Table/Figure 2.pdf]

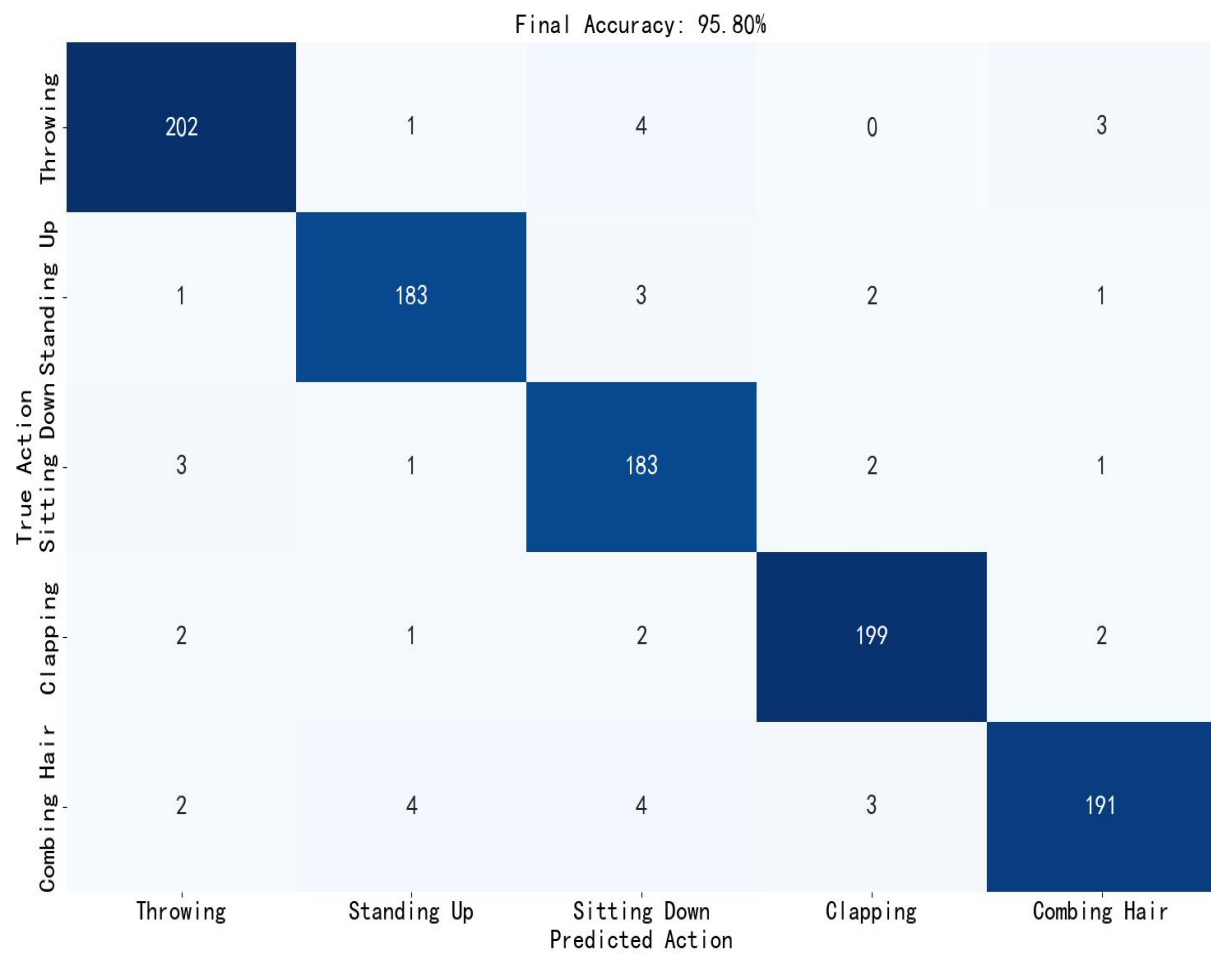

FedHRM model based on federated learning

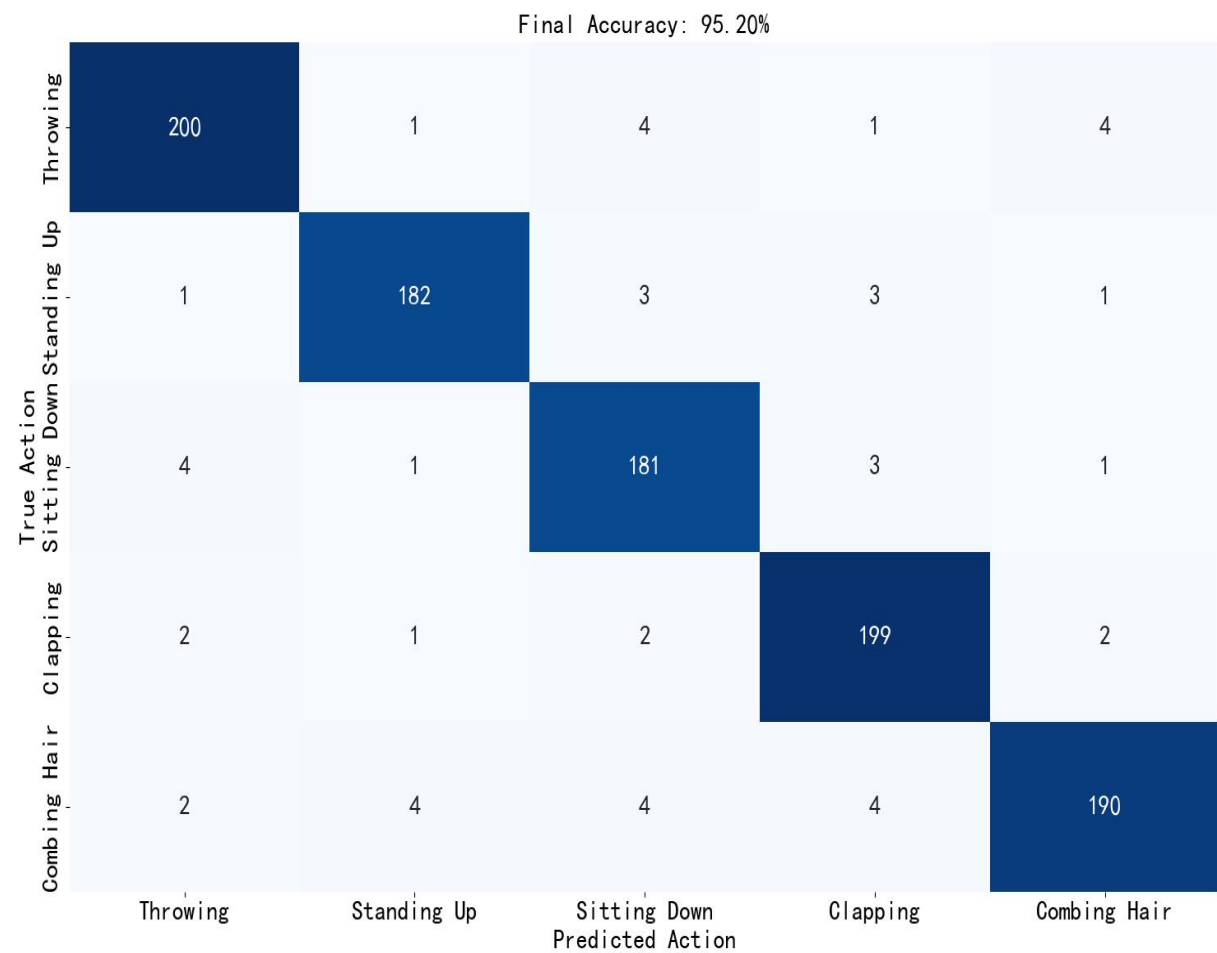

FedHRM model based on non-federated learning

Supplement: Supplementary file 3 [file Figure 3.pdf › Figure and Table/Figure 3.pdf]

skeleton

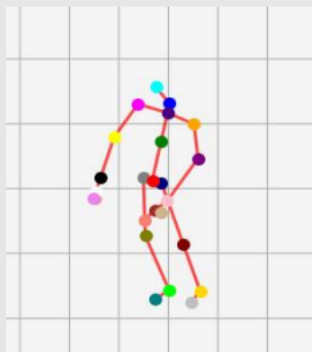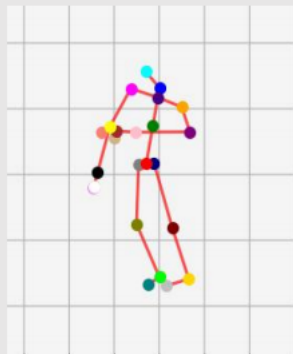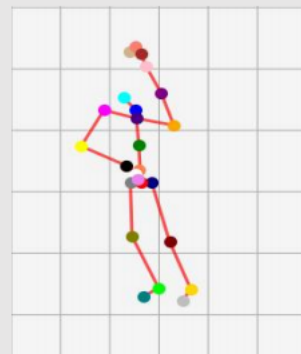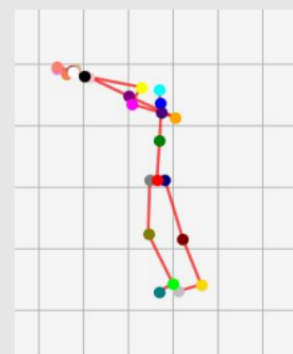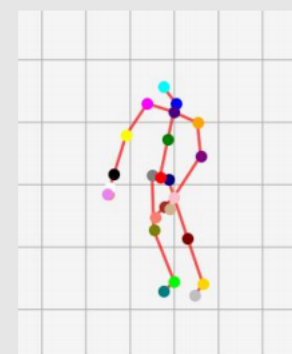

Depth

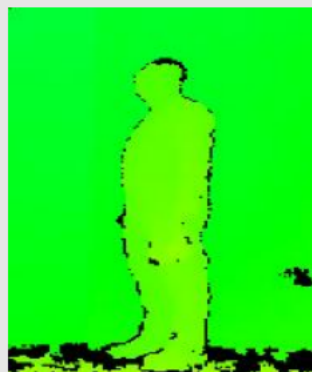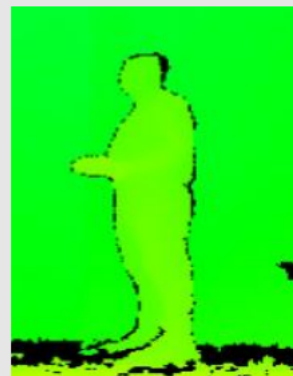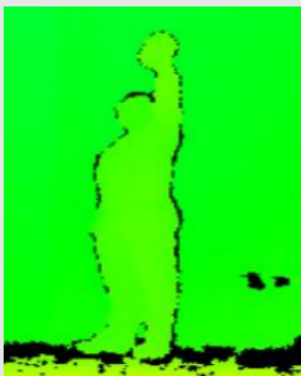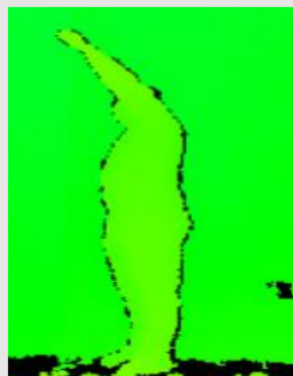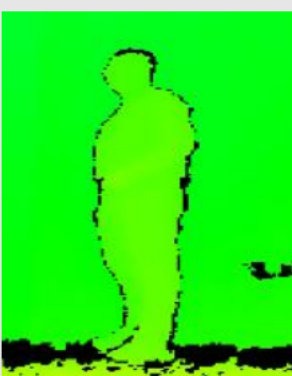

RGB

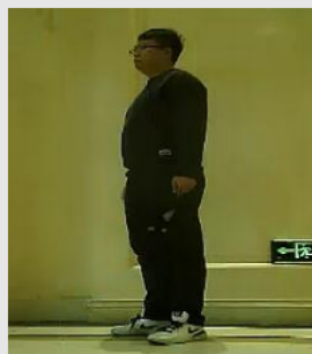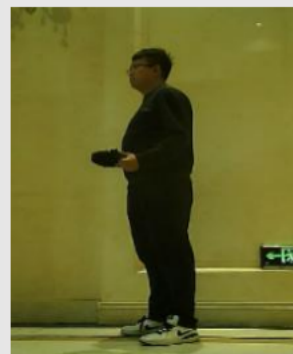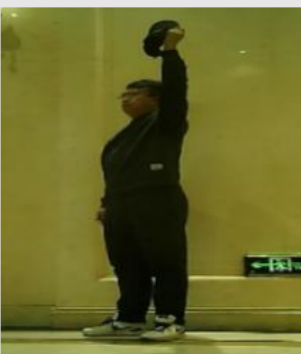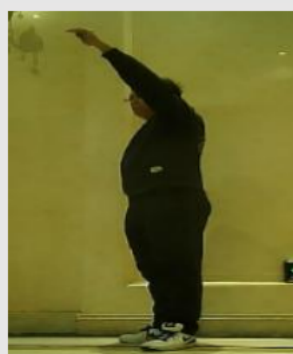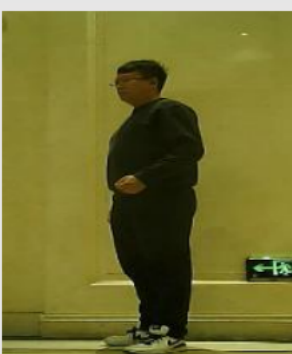

Supplement: Supplementary file 4 [file Figure 4.pdf › Figure and Table/Figure 4.pdf]

depth

endpoints

heatmap

overlay

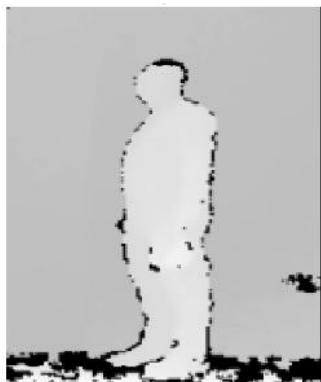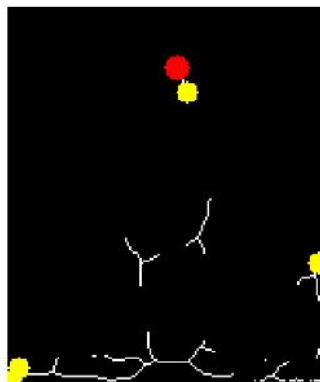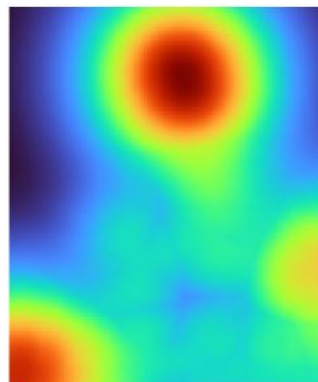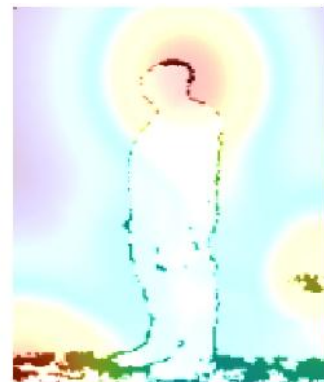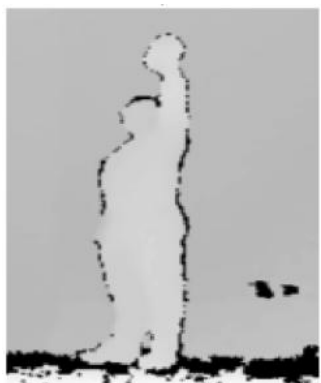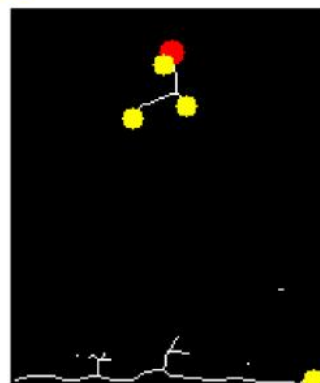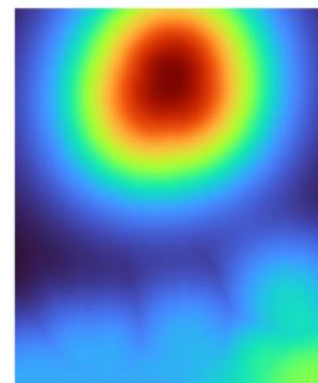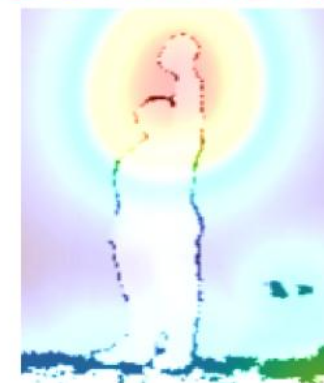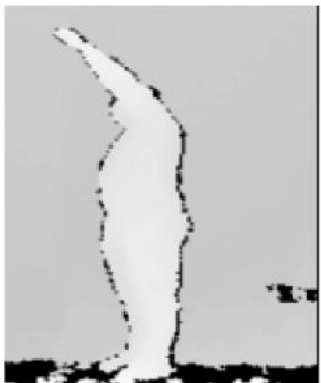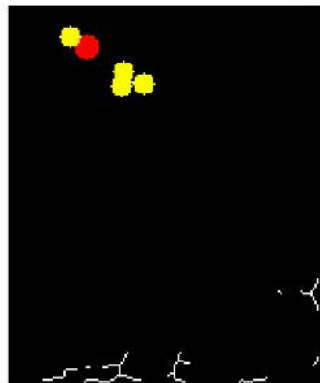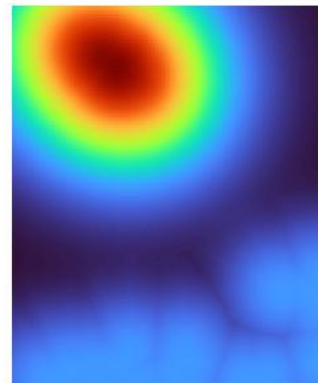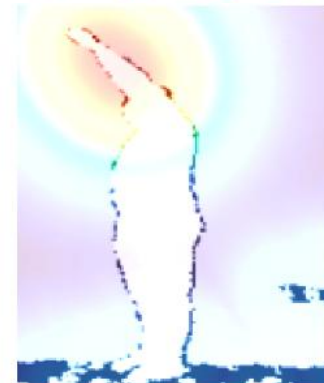

Supplement: Supplementary file 5 [file Figure 5.pdf › Figure and Table/Figure 5.pdf]
